# Supplementary material for: Whole exome sequencing identifies a recurrent RQCD1 P131L mutation in cutaneous melanoma
Source: PubMed Central journal article supplement (PMC4359221; doi:10.18632/oncotarget.2747), 2014-12-06
Supplement: oncotarget-06-1115-s001.pdf [file oncotarget-06-1115-s001.pdf]

## SUPPLEMENTARY FIGURE AND TABLES

| Gene   | CNOT1 | RQCD1    | CNOT3    | CNOT4    | CNOT10   | CNOT6    | CNOT6L   | CNOT2    | CNOT7    | CNOT8    | CNOT11 |
|--------|-------|----------|----------|----------|----------|----------|----------|----------|----------|----------|--------|
| CNOT1  | ---   | 0.543724 | 0.376319 | 0.376319 | 0.332294 | 0.667706 | 0.667706 | 0.181941 | 0.818059 | 0.935484 | 1      |
| RQCD1  |       | ---      | 0.792884 | 0.792884 | 0.180086 | 0.819914 | 0.819914 | 0.905987 | 0.905987 | 0.967742 | 1      |
| CNOT3  |       |          | ---      | 0.835407 | 0.857392 | 0.857392 | 0.142608 | 0.926346 | 0.926346 | 0.97491  | 1      |
| CNOT4  |       |          |          | ---      | 0.857392 | 0.857392 | 0.857392 | 0.926346 | 0.926346 | 0.97491  | 1      |
| CNOT10 |       |          |          |          | ---      | 0.876659 | 0.876659 | 0.936639 | 0.936639 | 0.978495 | 1      |
| CNOT6  |       |          |          |          |          | ---      | 0.123341 | 0.936639 | 0.936639 | 0.978495 | 1      |
| CNOT6L |       |          |          |          |          |          | ---      | 0.936639 | 0.936639 | 0.978495 | 1      |
| CNOT2  |       |          |          |          |          |          |          | ---      | 0.967974 | 0.989247 | 1      |
| CNOT7  |       |          |          |          |          |          |          |          | ---      | 0.989247 | 1      |
| CNOT8  |       |          |          |          |          |          |          |          |          | ---      | 1      |
| CNOT11 |       |          |          |          |          |          |          |          |          |          | ---    |

| Legend                                                                       |
|------------------------------------------------------------------------------|
| Strong tendency towards mutual exclusivity ( $0 < \text{Odds Ratio} < 0.1$ ) |
| Some tendency towards mutual exclusivity ( $0.1 < \text{Odds Ratio} < 0.5$ ) |
| No association ( $0.5 < \text{Odds Ratio} < 2$ )                             |
| Tendency toward co-occurrence ( $2 < \text{Odds Ratio} < 10$ )               |
| Strong tendency towards co-occurrence ( $\text{Odds Ratio} > 10$ )           |
| No events recorded for one or both genes                                     |

**Supplementary Figure 1: Mutually exclusive pattern of CCR4-NOT complex gene members based on TCGA mutational data from the subcutaneous melanoma dataset (provisional).** Table extracted from the cBioPortal for cancer genomics (Cerami et al. *Cancer Discovery*, May 2012 2; 401).

## Supplementary Table 1: Exome sequencing performance metrics

Supplementary Table 2: Analysis of immunogenicity of mutant *RQCD1* through IEDB

| Peptide       | Length | Score   |
|---------------|--------|---------|
| VSKTRLFEYLRLT | 13     | 0.24332 |
| VSKTRPFYLRRLT | 13     | 0.24332 |
| TRLFEYLRLTSLG | 13     | 0.12734 |
| TRPFYLRRLTSLG | 13     | 0.12734 |
| LHTVSKTRLFEYL | 13     | -0.047  |
| LHTVSKTRPFYLR | 13     | -0.047  |
| YPFLHTVSKTRLF | 13     | -0.161  |
| YPFLHTVSKTRPF | 13     | -0.161  |

## Supplementary Table 3: RQCD1 peptides

13 mers (individually and in mt/wt pools)

|   | Mutant        | Wild type     |
|---|---------------|---------------|
| A | YPFLHTVSKTRLF | YPFLHTVSKTRPF |
| B | LHTVSKTRLFEYL | LHTVSKTRPFYLR |
| C | VSKTRLFEYLRLT | VSKTRPFYLRRLT |
| D | TRLFEYLRLTSLG | TRPFYLRRLTSLG |

**Supplementary Table 4: Patient samples with HLA-typing results**

| Patient ID | HLA-A      | HLA-C      |
|------------|------------|------------|
| P11076     | 0301, 124  | 03, 07     |
| P12754     | 0201, 3303 | 0401, 0501 |
| P13488     | 0201       | 05, 06     |
| P13719     | 0201, 1101 | 304, 0602  |
| P14034     | 0201, 2501 | 05, 08     |
| P14322     | 0201, 0301 | 0304, 0702 |
| P14416     | 0206, 2601 | 0303, 1203 |
| P14600     | 0101       | 7          |
| P15097     | 2902       | 702        |
| P16021     | 1101, 3002 | 0202, 0401 |
| P16036     | 0101, 0301 | 0102, 0701 |
| LUD P1     | 02, 24     | 5, 7       |
| LUD P2     | 02, 26     | 0102, 0303 |
